# Supplementary material for: Effect of predicted low suspend pump treatment on improving glycaemic control and quality of sleep in children with type 1 diabetes and their caregivers: the QUEST randomized crossover study
Source: Springer Nature journal article supplement (doi:10.1186/s13063-018-3034-4), 2018-12-01
Supplement: MOESM16 [file 16314386]

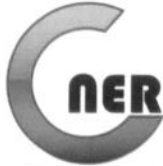

COMITÉ NATIONAL  
D'ÉTHIQUE DE RECHERCHE

Présidente : Dr BOISANTE-BOURRIER Catherine, Médecin spécialiste en anesthésie-réanimation

Vice-président : M. Marc HASTERT, maître en droit

Membres :

Prof. ANTON Fernand, PhD, Doctorats en psychologie et en physiologie, chercheur en neurosciences comportementales

Mme BECKER-BAUER Danielle, Pharmacienne

Dr COVELLI Domenico, Médecin spécialiste en oncologie

Dr DROSTE Dirk, médecin-spécialiste en neurologie

M. ELTER Robert, chimiste

M. GLOD Frank, PhD Frank Glod, PhD Doctorat en chimie organique, expert en chimie organique et en biologie moléculaire

Dr JACOBY Chrétien, médecin spécialiste en neuro-psychiatrie

Dr LE MOINE Françoise, Médecin spécialiste en oncologie

M. MAKHLOUF Abdul-Aziz, Pharmacien

Mme PETTINGER Patricia, Professeur de Philosophie

Dr SCHNEIDER Jochen, PhD, médecin spécialiste en endocrinologie et chercheur en médecine translationnelle

Dr Carine De Beaufort  
CHL -Clinique Pédiatrique  
4 rue Barblé  
L-1210 Luxembourg

Luxembourg, 23 th April 2018

***Study of title «QUEST: Quality of sIEep in children with diabeteS using new Technology»***

To whom it may concern,

We hereby certify that the study above mentioned has received a positive opinion (CNER N° 201609/07, effective on the 31 January 2017) of the National Research Ethics Committee (CNER) of Luxembourg.

Dr Catherine BOISANTÉ  
Présidente
